# Supplementary material for: Multiple Amino Acid Sequence Alignment Nitrogenase Component 1: Insights into Phylogenetics and Structure-Function Relationships
Source: PubMed Central journal article supplement (PMC3760896; doi:10.1371/journal.pone.0072751), 2013-09-03
Supplement: pone.0072751.s002.pdf [file pone.0072751.s002.pdf]

Table S-1. Identification of Species, Lineage, and Gene ID used for Multiple Sequence Alignment  
All Sequences are from genomes unless #

| <b>Nif Group I</b>                                      | <b>D-Gene, ID</b> | <b>K-Gene, ID</b> | <b>Lineage</b>        |
|---------------------------------------------------------|-------------------|-------------------|-----------------------|
| I-01 <i>Acidithiobacillus ferrooxidans</i> ATCC 23270   | YP_002425949.1    | YP_002425948.1    | Gammaproteobacteria   |
| I-02 <i>Anabaena variabilis</i> ATCC 29413              | YP_324742.1       | YP_324743.1       | Cyanobacteria         |
| I-03 <i>Azoarcus</i> sp. BH72                           | YP_932043.1       | YP_932044.1       | Betaproteobacteria    |
| I-04 <i>Azospirillum brasilense</i> Sp245               | CCC97491.1        | CCC97490.1        | Alphaproteobacteria   |
| I-05 <i>Azotobacter vinelandii</i> DJ                   | YP_002797379.1    | YP_002797380.1    | Gammaproteobacteria   |
| I-06 <i>Bradyrhizobium japonicum</i>                    | AAG60729.1        | AAG60730.1        | Alphaproteobacteria   |
| I-07 <i>Burkholderia xenovorans</i> LB400               | YP_553848.1       | YP_553847.1       | Betaproteobacteria    |
| I-08 <i>Calothrix desertica</i> PCC 7102 #              | AAN63662.1        | ACA61792.1        | Cyanobacteria         |
| I-09 <i>Chlorogloeopsis fritschii</i> PCC 6912 #        | AAP40828.1        | ACA61793.1        | Cyanobacteria         |
| I-10 <i>Cyanothece</i> sp. ATCC 51142                   | AAB61283.1        | AAB61284.1        | Cyanobacteria         |
| I-11 <i>Desulfitobacterium hafniense</i> DCB-2          | YP_002457546.1    | YP_002457547.1    | Clostridia            |
| I-12 <i>Desulfosporosinus</i> sp. OT                    | ZP_08811362.1     | ZP_08811361.1     | Clostridia            |
| I-13 <i>Fischerella muscicola</i> PCC 7414 #            | AAN63673.1        | ACA61795.1        | Cyanobacteria         |
| I-14 <i>Frankia alni</i> ACN14a                         | YP_716938.1       | YP_716937.1       | Actinobacteria        |
| I-15 <i>Geobacter sulfurreducens</i> PCA                | NP_953864.1       | NP_953863.1       | Deltaproteobacteria   |
| I-16 <i>Gluconacetobacter diazotrophicus</i> PAI 5      | YP_001600721.1    | YP_001600722.1    | Alphaproteobacteria   |
| I-17 <i>Halorhodospira halophila</i> SL1                | YP_001001869.1    | YP_001001868.1    | Gammaproteobacteria   |
| I-18 <i>Heliobacterium modesticaldum</i> Ice1           | YP_001679707.1    | YP_001679708.1    | Clostridia            |
| I-19 <i>Klebsiella pneumoniae</i> 342                   | YP_002237564.1    | YP_002237563.1    | Gammaproteobacteria   |
| I-20 <i>Magnetococcus marinus</i> MC-1                  | YP_865118.1       | YP_865117.1       | Alphaproteobacteria   |
| I-21 <i>Mesorhizobium loti</i> MAFF303099               | BAB52276.1        | BAB52277.1        | Alphaproteobacteria   |
| I-22 <i>Methylobacterium</i> sp. 4-46                   | YP_001770352.1    | YP_001770353.1    | Alphaproteobacteria   |
| I-23 <i>Methylococcus capsulatus</i> str. Bath          | YP_112765.1       | YP_112766.1       | Gammaproteobacteria   |
| I-24 <i>Methylocystis</i> sp. ATCC 49242                | ZP_08073551.1     | ZP_08073550.1     | Alphaproteobacteria   |
| I-25 <i>Nodularia spumigena</i> CCY9414                 | ZP_01628430.1     | ZP_01628425.1     | Cyanobacteria         |
| I-26 <i>Nostoc</i> sp. PCC 7120                         | NP_485484.1       | NP_485483.1       | Cyanobacteria         |
| I-27 <i>Pectobacterium atrosepticum</i> SCRI1043        | YP_051046.1       | YP_051045.1       | Gammaproteobacteria   |
| I-28 <i>Pelobacter carbinolicus</i> DSM 2380            | YP_357509.1       | YP_357510.1       | Deltaproteobacteria   |
| I-29 <i>Polaromonas naphthalenivorans</i> CJ2           | YP_982572.1       | YP_982571.1       | Betaproteobacteria    |
| I-30 <i>Pseudomonas stutzeri</i> A1501                  | YP_001171864.1    | YP_001171865.1    | Gammaproteobacteria   |
| I-31 <i>Rhodobacter capsulatus</i> SB 1003              | YP_003576743.1    | YP_003576742.1    | Alphaproteobacteria   |
| I-32 <i>Rhodobacter sphaeroides</i> 2.4.1               | YP_353613.1       | YP_353612.1       | Alphaproteobacteria   |
| I-33 <i>Rhodomicrobium vannielii</i> ATCC 17100         | YP_004012289.1    | YP_004012290.1    | Alphaproteobacteria   |
| I-34 <i>Rhodopseudomonas palustris</i> CGA009           | CAE30059.1        | CAE30058.1        | Alphaproteobacteria   |
| I-35 <i>Rhodospirillum rubrum</i> ATCC 11170            | YP_426099.1       | YP_426100.1       | Alphaproteobacteria   |
| I-36 <i>Scytonema</i> sp. PCC 7814 #                    | AAP40826.1        | ACA61802.1        | Cyanobacteria         |
| I-37 <i>Sinorhizobium fredii</i> NGR234]                | NP_444137.1       | NP_444138.1       | Alphaproteobacteria   |
| I-38 <i>Sinorhizobium medicae</i> WSM419                | YP_001314761.1    | YP_001314760.1    | Alphaproteobacteria   |
| I-39 <i>Synechococcus</i> sp. JA-2-3B'a(2-13)           | YP_476681.1       | YP_476682.1       | Cyanobacteria         |
| I-40 <i>Syntrophobotulus glycolicus</i> DSM 8271        | YP_004267111.1    | YP_004267110.1    | Clostridia            |
| I-41 <i>Thermodesulfovibrio yellowstonii</i> DSM 11347  | ACI21314.1        | ACI20660.1        | Nitrospira            |
| I-42 <i>Trichodesmium erythraeum</i> IMS101             | AAF82638.1        | AAF82639.1        | Cyanobacteria         |
| I-43 <i>Wolinella succinogenes</i>                      | CAE10458.1        | CAE10457.1        | Epsilonproteobacteria |
| I-44 <i>Xanthobacter autotrophicus</i> Py2              | YP_001415005.1    | YP_001415006.1    | Alphaproteobacteria   |
| I-45 <i>Zymomonas mobilis</i> subsp. <i>mobilis</i> ZM4 | YP_163559.1       | YP_163560.1       | Alphaproteobacteria   |

| <b>Nif Group II</b>                                              | <b>D-Gene, ID</b> | <b>K-Gene, ID</b> | <b>Lineage</b>        |
|------------------------------------------------------------------|-------------------|-------------------|-----------------------|
| II-01 <i>Alkaliphilus metalliredigens</i> QYMF                   | YP_001321307.1    | YP_001321306.1    | Clostridia            |
| II-02 <i>Candidatus Methanoregula boonei</i> 6A8                 | YP_001404306.1    | YP_001404307.1    | Methanomicrobia       |
| II-03 <i>Chlorobium phaeobacteroides</i> DSM 266                 | ABL64794.1        | ABL64793.1        | Chlorobia             |
| II-04 <i>Chlorobium tepidum</i> TLS                              | NP_662420.1       | NP_662421.1       | Chlorobia             |
| II-05 <i>Clostridium beijerinckii</i> NCIMB 8052                 | YP_001309128.1    | YP_001309129.1    | Clostridia            |
| II-06 <i>Clostridium kluiveri</i> DSM 555                        | EDK35086.1        | EDK35085.1        | Clostridia            |
| II-07 <i>Clostridium pasteurianum</i> DSM 525                    | WP_003447876.1    | WP_003447875.1    | Clostridia            |
| II-08 <i>Dehalococcoides ethenogenes</i> 195                     | YP_181869.1       | YP_181868.1       | Chloroflexi           |
| II-09 <i>Desulfonatospira thiodismutans</i> ASO3-1               | ZP_07015346.1     | ZP_07015347.1     | Chloroflexi           |
| II-10 <i>Desulfotomaculum reducens</i> MI-01                     | YP_001114147.1    | YP_001114146.1    | Clostridia            |
| II-11 <i>Desulfovibrio vulgaris</i> str. Hildenborough           | YP_009052.1       | YP_009051.1       | Deltaproteobacteria   |
| II-12 <i>Diplosphaera colitermitum</i> TAV5                      | ZP_09596373.1     | ZP_09596374.1     | Verrucomicrobia       |
| II-13 <i>Ethanoligenens harbinense</i> YUAN-3                    | YP_004091831.1    | YP_004091830.1    | Clostridia            |
| II-14 <i>Methanosarcina acetivorans</i> C2A                      | NP_618769.1       | NP_618770.1       | Methanomicrobia       |
| II-15 <i>Methanosarcina barkeri</i>                              | YP_303733.1       | YP_303732.1       | Methanomicrobia       |
| II-16 <i>Methanosphaerula palustris</i> E1-9c                    | ACL15931.1        | ACL15930.1        | Methanomicrobia       |
| II-17 <i>Paludibacter propionicigenes</i> WB4                    | YP_004042557.1    | YP_004042558.1    | Bacteroidetes         |
| II-18 <i>Thermoanaerobacterium thermosaccharolyticum</i> DSM 571 | ADL69354.1        | ADL69353.1        | Clostridia            |
| <b>Nif Group III</b>                                             | <b>D-Gene, ID</b> | <b>K-Gene, ID</b> | <b>Lineage</b>        |
| III-01 <i>Caldicellulosiruptor saccharolyticus</i> DSM 8903      | YP_001181231.1    | YP_001181230.1    | Clostridia            |
| III-02 <i>Candidatus Desulforudis audaxviator</i> MP104C         | YP_001716346.1    | YP_001716347.1    | Clostridia            |
| III-03 <i>Desulfotomaculum kuznetsovii</i> DSM 6115              | YP_004518628.1    | YP_004518627.1    | Clostridia            |
| III-04 <i>Methanocaldococcus</i> sp. FS406-22                    | YP_003457471.1    | YP_003457472.1    | Methanococci          |
| III-05 <i>Methanococcus aeolicus</i> Nankai-03                   | ABR57007.1        | ABR57006.1        | Methanococci          |
| III-06 <i>Methanococcus maripaludis</i> C5                       | YP_001097187.1    | YP_001097188.1    | Methanococci          |
| III-07 <i>Methanothermobacter thermautotrophicus</i> , Delta H   | NP_276676.1       | NP_276677.1       | Methanobacteria       |
| III-08 <i>Thermodesulfatator indicus</i> DSM 15286               | YP_004625888.1    | YP_004625889.1    | Thermodesulfobacteria |
| <b>Nif Group IV</b>                                              | <b>D-Gene, ID</b> | <b>K-Gene, ID</b> | <b>Lineage</b>        |
| IV-01 <i>Oscillochloris trichoides</i> DG6                       | ZP_07684112.1     | ZP_07684111.1     | Methanococci          |
| IV-02 <i>Roseiflexus</i> sp. RS-1                                | YP_001275556.1    | YP_001275555.1    | Chloroflexi           |
| IV-03 <i>Roseiflexus castenholzii</i> DSM 13941                  | YP_001434092.1    | YP_001434091.1    | Chloroflexi           |
| <b>Group Anf</b>                                                 | <b>D-Gene, ID</b> | <b>K-Gene, ID</b> | <b>Lineage</b>        |
| A-01 <i>Azotobacter vinelandii</i> DJ                            | YP_002801974.1    | YP_002801972.1    | Gamma proteobacteria  |
| A-02 <i>Clostridium kluiveri</i> DSM 555                         | YP_001393772.1    | YP_001393774.1    | Clostridia            |
| A-03 <i>Desulfosporosinus</i> sp. OT                             | ZP_08813146.1     | ZP_08813148.1     | Clostridia            |
| A-04 <i>Diplosphaera colitermitum</i> TAV2                       | ZP_03727075.1     | ZP_03727077.1     | Verrucomicrobia       |
| A-05 <i>Methanosarcina acetivorans</i> C2A                       | NP_616149.1       | NP_616147.1       | Methanomicrobia       |
| A-06 <i>Methanosarcina barkeri</i> str. Fusaro                   | AAZ70500.1        | AAZ70498.1        | Methanomicrobia       |
| A-07 <i>Paludibacter propionicigenes</i> WB4                     | ADQ79509.1        | ADQ79507.1        | Bacteroidetes         |
| A-08 <i>Rhodobacter capsulatus</i> SB 1003                       | ADE84351.1        | ADE84353.1        | Alphaproteobacteria   |
| A-09 <i>Rhodomicrobium vanniellii</i> ATCC 17100                 | YP_004013646.1    | YP_004013644.1    | Alphaproteobacteria   |
| A-10 <i>Rhodopseudomonas palustris</i> CGA009                    | NP_946787.1       | NP_946785.1       | Alphaproteobacteria   |
| A-11 <i>Rhodospirillum rubrum</i> ATCC 11170                     | YP_426482.1       | YP_426480.1       | Alphaproteobacteria   |
| A-12 <i>Syntrophobotulus glycolicus</i> DSM 8271                 | ADY57120.1        | ADY57118.1        | Clostridia            |

| <b>Group Vnf</b>                                | <b>D-Gene, ID</b> | <b>K-Gene, ID</b> | <b>Lineage</b>       |
|-------------------------------------------------|-------------------|-------------------|----------------------|
| V-01 <i>Anabaena variabilis</i> ATCC 29413      | ABA23631.1        | ABA23632.1        | Cyanobacteria        |
| V-02 <i>Azospirillum brasilense</i> Sp245       | CCD03004.1        | CCD03006.1        | Alphaproteobacteria  |
| V-03 <i>Azotobacter vinelandii</i> DJ           | YP_002797497.1    | YP_002797495.1    | Gamma proteobacteria |
| V-04 <i>Clostridium kluyveri</i> DSM 555        | YP_001395137.1    | YP_001395135.1    | Clostridia           |
| V-05 <i>Ethanoligenens harbinense</i> YUAN-3    | YP_004092555.1    | YP_004092557.1    | Clostridia           |
| V-06 <i>Methanosarcina acetivorans</i> C2A      | NP_616155.1       | NP_616157.1       | Methanomicrobia      |
| V-07 <i>Methanosarcina barkeri</i> str. Fusaro  | AAZ71203.1        | AAZ71201.1        | Methanomicrobia      |
| V-08 <i>Rhodomicrobium vannielii</i> ATCC 17100 | YP_004010895.1    | YP_004010897.1    | Proteobacteria       |
| V-09 <i>Rhodospseudomonas palustris</i> CGA009  | NP_946728.1       | NP_946730.1       | Proteobacteria       |
