# Supplementary material for: Multiple Amino Acid Sequence Alignment Nitrogenase Component 1: Insights into Phylogenetics and Structure-Function Relationships
Source: PubMed Central journal article supplement (PMC3760896; doi:10.1371/journal.pone.0072751), 2013-09-03
Supplement: pone.0072751.s005.pdf [file pone.0072751.s005.pdf]

**Table S-4. Amino Acid Residue Variance in  $\beta$ -Subunit (Gene K)<sup>1,2,3</sup>**

| <b>Residue number</b> | <b>Invariant</b> | <b>Total Dominant &gt;90%</b> | <b>Single variant, Dominant</b> | <b>Single variant</b> | <b>Double variant, Dominant</b> | <b>Double variant</b> | <b>Multiple variant, Dominant</b> |
|-----------------------|------------------|-------------------------------|---------------------------------|-----------------------|---------------------------------|-----------------------|-----------------------------------|
|                       | <b>27</b>        | <b>41</b>                     | <b>23</b>                       | <b>10</b>             | <b>7</b>                        | <b>14</b>             | <b>11</b>                         |
| <b>64</b>             |                  |                               |                                 | <b>I/V</b>            |                                 |                       |                                   |
| <b>65</b>             |                  | <b>91 N</b>                   | <b>N/d</b>                      |                       |                                 |                       |                                   |
| <b>66</b>             |                  | <b>93 P</b>                   | <b>P/a</b>                      |                       |                                 |                       |                                   |
| <b>70</b>             | <b>C</b>         |                               |                                 |                       |                                 |                       |                                   |
| <b>71</b>             |                  | <b>89 Q</b>                   |                                 |                       | <b>Q/a/m</b>                    |                       |                                   |
| <b>72</b>             | <b>P</b>         |                               |                                 |                       |                                 |                       |                                   |
| <b>74</b>             | <b>G</b>         |                               |                                 |                       |                                 |                       |                                   |
| <b>75</b>             |                  | <b>92 A</b>                   | <b>A/s</b>                      |                       |                                 |                       |                                   |
| <b>78</b>             |                  |                               |                                 |                       |                                 | <b>A/C/V</b>          |                                   |
| <b>81</b>             |                  | <b>94 G</b>                   | <b>G/a</b>                      |                       |                                 |                       |                                   |
| <b>90</b>             |                  |                               |                                 | <b>H/Q</b>            |                                 |                       |                                   |
| <b>91</b>             | <b>G</b>         |                               |                                 |                       |                                 |                       |                                   |
| <b>92</b>             |                  |                               |                                 |                       |                                 | <b>S/G/a</b>          |                                   |
| <b>93</b>             |                  | <b>94 Q</b>                   | <b>Q/h</b>                      |                       |                                 |                       |                                   |
| <b>94</b>             | <b>G</b>         |                               |                                 |                       |                                 |                       |                                   |
| <b>95</b>             | <b>C</b>         |                               |                                 |                       |                                 |                       |                                   |
| <b>98</b>             |                  |                               |                                 | <b>Y/F</b>            |                                 |                       |                                   |
| <b>100</b>            | <b>R</b>         |                               |                                 |                       |                                 |                       |                                   |
| <b>105</b>            |                  |                               |                                 | <b>R/Q</b>            |                                 |                       |                                   |
| <b>106</b>            |                  | <b>91 H</b>                   |                                 |                       |                                 |                       | <b>H (i,n,v)</b>                  |
| <b>108</b>            |                  |                               |                                 |                       |                                 | <b>K/R/q</b>          |                                   |
| <b>109</b>            |                  |                               |                                 | <b>E/D</b>            |                                 |                       |                                   |
| <b>117</b>            |                  | <b>94 S</b>                   | <b>S/a</b>                      |                       |                                 |                       |                                   |
| <b>119</b>            |                  |                               |                                 |                       |                                 | <b>T/H/s</b>          |                                   |
| <b>120</b>            | <b>E</b>         |                               |                                 |                       |                                 |                       |                                   |
| <b>124</b>            | <b>V</b>         |                               |                                 |                       |                                 |                       |                                   |
| <b>125</b>            |                  | <b>89 F</b>                   |                                 |                       | <b>F/Y/I</b>                    |                       |                                   |
| <b>126</b>            | <b>G</b>         |                               |                                 |                       |                                 |                       |                                   |
| <b>127</b>            |                  |                               |                                 | <b>G/A</b>            |                                 |                       |                                   |
| <b>130</b>            |                  |                               |                                 | <b>N/R</b>            |                                 |                       |                                   |
| <b>134</b>            |                  |                               |                                 |                       |                                 | <b>G/A/s</b>          |                                   |
| <b>142</b>            |                  | <b>90 Y</b>                   | <b>Y/f</b>                      |                       |                                 |                       |                                   |

Table S-4, continued

| Residue number | Invariant | Total Dominant >90% | Single variant, Dominant | Single variant | Double variant, Dominant | Double variant | Multiple variant, Dominant |
|----------------|-----------|---------------------|--------------------------|----------------|--------------------------|----------------|----------------------------|
| 151            |           | 88 T                | T/S                      |                |                          |                |                            |
| 152            |           | 88 T                | T/S                      |                |                          |                |                            |
| 153            | C         |                     |                          |                |                          |                |                            |
| 156            | E         |                     |                          |                |                          |                |                            |
| 157            |           |                     |                          |                |                          | V/T/I          |                            |
| 158            |           | 93 I                |                          |                | I/l/v                    |                |                            |
| 159            | G         |                     |                          |                |                          |                |                            |
| 160            |           | 94 D                | D/e                      |                |                          |                |                            |
| 161            | D         |                     |                          |                |                          |                |                            |
| 186            |           | 90 T                |                          |                | T/c/q                    |                |                            |
| 187            | P         |                     |                          |                |                          |                |                            |
| 188            |           |                     |                          | S/A            |                          |                |                            |
| 189            |           |                     |                          | F/Y            |                          |                |                            |
| 191            |           | 89G                 |                          |                |                          |                | G (a,e,m,s)                |
| 192            |           | 91 S,T              |                          |                |                          |                | S (h,n,t)                  |
| 193            |           |                     |                          |                |                          | H/M/Q          |                            |
| 196            | G         |                     |                          |                |                          |                |                            |
| 197            |           |                     |                          |                |                          | Y/F/W          |                            |
| 229            | G         |                     |                          |                |                          |                |                            |
| 235            |           |                     |                          |                |                          | G/A/s          |                            |
| 236            |           |                     |                          |                |                          | D/N/s          |                            |
| 241            |           | 88 K                |                          |                |                          |                | K (g,q,r)                  |
| 256            |           |                     |                          | D/E            |                          |                |                            |
| 262            |           | 88 D                |                          |                |                          |                | D (m,n,y)                  |
| 264            |           | 91 P                | P/g                      |                |                          |                |                            |
| 274            |           | 91 G                |                          |                |                          |                | G (a,e,k,p)                |
| 276            |           | 92 T                |                          |                | T/l/a                    |                |                            |
| 319            | P         |                     |                          |                |                          |                |                            |
| 321            | G         |                     |                          |                |                          |                |                            |
| 325            |           | 94 T                | T/v                      |                |                          |                |                            |
| 326            | D         |                     |                          |                |                          |                |                            |
| 329            |           |                     |                          |                |                          | L/I/V          |                            |
| 340            |           |                     |                          |                |                          | I/V/p          |                            |
| 341            |           | 87 P                |                          |                |                          |                | P (a,g,s,t)                |

**Table S-4, continued**

| <b>Residue number</b> | <b>Invariant</b> | <b>Total Dominant &gt;90%</b> | <b>Single variant, Dominant</b> | <b>Single variant</b> | <b>Double variant, Dominant</b> | <b>Double variant</b> | <b>Multiple variant, Dominant</b> |
|-----------------------|------------------|-------------------------------|---------------------------------|-----------------------|---------------------------------|-----------------------|-----------------------------------|
| 347                   |                  | 90 E                          |                                 |                       |                                 |                       | E (a,g,s,t)                       |
| 348                   | R                |                               |                                 |                       |                                 |                       |                                   |
| 349                   |                  | 92 G                          | G/a                             |                       |                                 |                       |                                   |
| 351                   |                  |                               |                                 |                       |                                 | L/A/v                 |                                   |
| 352                   |                  |                               |                                 |                       |                                 | V/I/L                 |                                   |
| 353                   |                  | 94 D                          | D/n                             |                       |                                 |                       |                                   |
| 357                   |                  | 93 D                          | D/n                             |                       |                                 |                       |                                   |
| 365                   |                  | 88 K                          |                                 |                       |                                 |                       | K (l,q,r)                         |
| 368                   |                  | 89 A                          |                                 |                       | A/g/s                           |                       |                                   |
| 371                   |                  | 94 G                          | G/a                             |                       |                                 |                       |                                   |
| 373                   |                  | 93 P                          | P/a                             |                       |                                 |                       |                                   |
| 374                   |                  | 94 D                          | D/s                             |                       |                                 |                       |                                   |
| 382                   |                  | 86 F                          |                                 |                       |                                 |                       | F (i,l,y)                         |
| 390                   |                  | 93 P                          | P/v                             |                       |                                 |                       |                                   |
| 426                   | D                |                               |                                 |                       |                                 |                       |                                   |
| 440                   |                  | 94 D                          | D/e                             |                       |                                 |                       |                                   |
| 444                   |                  | 93 G                          | G/s                             |                       |                                 |                       |                                   |
| 448                   |                  | 88 G                          |                                 |                       |                                 |                       | G (a,c,l)                         |
| 465                   |                  | 92 P                          |                                 |                       | P/k/g                           |                       |                                   |
| 468                   | R                |                               |                                 |                       |                                 |                       |                                   |
| 472                   |                  | 93 P                          | P/f                             |                       |                                 |                       |                                   |
| 475                   | D                |                               |                                 |                       |                                 |                       |                                   |
| 476                   | R                |                               |                                 |                       |                                 |                       |                                   |
| 486                   |                  | 94 G                          | G/f                             |                       |                                 |                       |                                   |
| 487                   | Y                |                               |                                 |                       |                                 |                       |                                   |
| 489                   | G                |                               |                                 |                       |                                 |                       |                                   |

<sup>1</sup> Based upon core sequence alignment, 95 sequences. Co-aligned residues: 62-142; 143-170; 177-180; 182-210; 225-233; 235-250; 252-257; 259-265; 270-273; 274-298; 300-306; 309; 311-316; 319-357; 358-359; 361-397; 398; 400-410; 420-422; 426-433; 435; 439-448; 449-455; 464-508 *A. vinelandii*,  $\beta$ -subunit numbering.

<sup>2</sup> Residue numbers based upon the *Azotobacter vinelandii*  $\beta$ -subunit. Amino acid residues using single letter designation, lower case residue less than 5/95 sequences. Number in total dominant column indicates the residue is >86 (90%) one amino acid in the 95 sequences. First amino acid in the list is the more common.

<sup>3</sup> Numbers at top of columns are the sum of occurrences for the column.
