# Supplementary material for: Multiple Amino Acid Sequence Alignment Nitrogenase Component 1: Insights into Phylogenetics and Structure-Function Relationships
Source: PLoS One. 2013 Sep 3;8(9):e72751. doi: 10.1371/journal.pone.0072751 (PMC3760896; doi:10.1371/journal.pone.0072751)
Supplement: Table S2 — Residues co-aligned across the 95 sequences. (PDF) [file pone.0072751.s003.pdf]

Table S-2. Residues co-aligned across the 95 sequences

Gene D ( $\alpha$ -subunit)

*A. vinelandii* sequence numbers

17-35; 48-89; 90-93; 95-100; 108-110; 112-144; 146-174;  
176-207; 221-317; 320-368; 369-391; 394-446; 448-479

| Block Residues | i, insertions; d, deletions, within blocks |       |           |
|----------------|--------------------------------------------|-------|-----------|
| 17-35          |                                            |       |           |
| 48-100         | 89-i                                       | 94-d  |           |
| 108-207        | 111-d                                      | 145-d | 174-5-i/d |
| 221-391        | 318-9-i/d                                  | 368-i |           |
| 394-479        | 397-i                                      | 447-d |           |

Gene K ( $\beta$ -subunit)

*A. vinelandii* sequence numbers

Co-aligned residues: 62-142; 143-170; 177-180; 182-210; 225-233; 235-250; 252-257; 259-265;  
270-273; 274-298; 300-306; 309; 311-316; 319-357; 358-359; 361-397; 398; 400-410; 420-422;  
426-433; 435; 439-448; 449-455; 464-508

| Block Residues | i, insertions; d, deletions, within blocks |         |         |       |         |       |       |       |
|----------------|--------------------------------------------|---------|---------|-------|---------|-------|-------|-------|
| 62-170         | 142-i                                      |         |         |       |         |       |       |       |
| 177-210        | 181-i                                      |         |         |       |         |       |       |       |
| 225-265        | 233-4-i/d                                  | 251-i/d | 258-d   |       |         |       |       |       |
| 270-398        | 273-i                                      | 299-d   | 307-8-d | 310-d | 317-8-d | 357-i | 360-d | 397-i |
| 400-410        |                                            |         |         |       |         |       |       |       |
| 420-422        |                                            |         |         |       |         |       |       |       |
| 426-435        | 434-d                                      |         |         |       |         |       |       |       |
| 439-455        | 448-i                                      |         |         |       |         |       |       |       |
| 464-508        |                                            |         |         |       |         |       |       |       |
